# Supplementary material
Source: HighWire-hosted journal article supplement (https://www.rcpjournals.org/highwire/filestream/7171/field_highwire_adjunct_files/0/Macerollo_-_S1.pdf)
Supplement: Macerollo_-_S1.pdf [file Macerollo_-_S1.pdf]

Table S1. Clinical approach to chorea

| Clinical presentation                           | Possible aetiologies                                                                                                                                                                                                                                                                                                                                                                                                                                                                                                                                                                                                                                                                                                                                                                                                                                                                                                                                                                                                                                                                                                                                                                                                                                                                                                                                                                                                                                                                                                                                                                                                                                       | Diagnostic investigations                                                                                                                                                                                                                                                                                                                                                                                                                                                                                                                                                                                                                                                                                                                                                                                                                                                                                                                              |
|-------------------------------------------------|------------------------------------------------------------------------------------------------------------------------------------------------------------------------------------------------------------------------------------------------------------------------------------------------------------------------------------------------------------------------------------------------------------------------------------------------------------------------------------------------------------------------------------------------------------------------------------------------------------------------------------------------------------------------------------------------------------------------------------------------------------------------------------------------------------------------------------------------------------------------------------------------------------------------------------------------------------------------------------------------------------------------------------------------------------------------------------------------------------------------------------------------------------------------------------------------------------------------------------------------------------------------------------------------------------------------------------------------------------------------------------------------------------------------------------------------------------------------------------------------------------------------------------------------------------------------------------------------------------------------------------------------------------|--------------------------------------------------------------------------------------------------------------------------------------------------------------------------------------------------------------------------------------------------------------------------------------------------------------------------------------------------------------------------------------------------------------------------------------------------------------------------------------------------------------------------------------------------------------------------------------------------------------------------------------------------------------------------------------------------------------------------------------------------------------------------------------------------------------------------------------------------------------------------------------------------------------------------------------------------------|
| <b>Acute or subacute hemichorea/hemiballism</b> | Immune-mediated <ul style="list-style-type: none"> <li>&gt; Sydenham's chorea</li> <li>&gt; Antiphospholipid antibody syndrome</li> <li>&gt; Systemic lupus erythematosus</li> <li>&gt; Other connective tissue diseases (eg Sjogren's syndrome)</li> <li>&gt; Coeliac disease</li> <li>&gt; Paraneoplastic (associated with anti-CRMP5 and anti-Hu antibodies)</li> </ul>                                                                                                                                                                                                                                                                                                                                                                                                                                                                                                                                                                                                                                                                                                                                                                                                                                                                                                                                                                                                                                                                                                                                                                                                                                                                                 | First level <ul style="list-style-type: none"> <li>&gt; Magnetic resonance imaging head (including contrast-enhanced, diffusion-weighted or susceptibility-weighted sequences; plus magnetic resonance angiography or conventional angiography, if required)</li> <li>&gt; Antistreptolysin O and anti-deoxyribonuclease B antibodies</li> <li>&gt; Anti-<math>\beta_2</math>-glycoprotein I (IgG) antibodies</li> <li>&gt; Anti-double stranded DNA antibodies</li> <li>&gt; Lupus anticoagulant</li> <li>&gt; Acute phase reactants (erythrocyte sedimentation rate, C-reactive protein)</li> <li>&gt; Full blood count</li> <li>&gt; Electrolytes</li> <li>&gt; Thyroid function tests</li> <li>&gt; Throat culture analysis for group A Streptococcus</li> <li>&gt; Glycemic level – plasma osmolality – plasma ketones</li> <li>&gt; Doppler echocardiography</li> <li>&gt; ECG</li> <li>&gt; HIV test</li> </ul>                                 |
| <b>Acute or subacute generalised chorea</b>     | Autoimmune encephalitides/encephalopathies (secondary to anti-NMDA receptor, anti-LGI1, anti-GAD65, anti-CASPR2, anti-GABA-B receptor antibodies) <p>Endocrinological</p> <ul style="list-style-type: none"> <li>&gt; Thyrotoxicosis</li> <li>&gt; Chorea gravidarum</li> <li>&gt; Chorea secondary to oral contraceptives or hormone replacement therapy</li> </ul> <p>Drug- and toxin-induced</p> <ul style="list-style-type: none"> <li>&gt; Drugs (antiepileptics, calcium channel blockers, anticholinergics, digoxin, lithium, tricyclic antidepressants, fluoxetine, cyclosporine, ciprofloxacin, baclofen, theophylline, methotrexate, interferon-alpha, ribavirin, methadone)</li> <li>&gt; Recreational drugs (D-amphetamine and derivatives, pemoline, cocaine, crack)</li> <li>&gt; Carbon monoxide encephalopathy</li> </ul> <p>Infectious</p> <ul style="list-style-type: none"> <li>&gt; Viral encephalitides (HSV-1, VZV, measles, German measles, CMV, West Nile virus, Parvovirus B19, Japanese B encephalitis)</li> <li>&gt; Bacterial infections (Diphtheria, Legionella and Salmonella species, Neuroborreliosis, Neurosyphilis)</li> </ul> <p>Other metabolic aetiologies</p> <ul style="list-style-type: none"> <li>&gt; Posterior reversible encephalopathy syndrome</li> <li>&gt; Hypocalcaemia</li> <li>&gt; Type 2 diabetes and uraemia with T<sub>2</sub> striatal hyperintensities</li> <li>&gt; Central extrapontine myelinolysis</li> </ul> <p>Vascular/haemodynamic</p> <ul style="list-style-type: none"> <li>&gt; Polycythemia vera</li> <li>&gt; Essential thrombocytemia</li> <li>&gt; 'Post-pump' syndrome</li> </ul> | Second level <ul style="list-style-type: none"> <li>&gt; Anti-NMDA receptor antibodies (followed by computed tomography pelvis, if justified by clinical presentation)</li> <li>&gt; Anti-neuronal antibodies (anti-CRMP5/CV2, anti-Hu, anti-Yo antibodies)</li> <li>&gt; Anti-SS-A and anti-SS-B antibodies</li> <li>&gt; Anti-gliadin and anti-transglutaminase antibodies</li> <li>&gt; Genetic screening for <i>PRRT2</i>, <i>MR1</i>, <i>SLC2A1</i>, <i>GLUT1</i> gene mutations (if paroxysmal)</li> <li>&gt; Cerebral SPECT (if required)</li> <li>&gt; Carotid/vertebral arterial Doppler studies</li> <li>&gt; Pregnancy test (if justified by clinical presentation)</li> <li>&gt; EEG (if justified by clinical presentation)</li> </ul> <p>Third level (if the cause remains undefined)</p> <ul style="list-style-type: none"> <li>&gt; Cerebrospinal fluid analysis (14-3-3 protein, cells, viral or bacterial antibodies/PCR)</li> </ul> |
| <b>Episodic (paroxysmal) chorea</b>             | <p>Genetic</p> <ul style="list-style-type: none"> <li>&gt; Paroxysmal kinesigenic dyskinesias (<i>PRRT2</i> gene mutations, genetically undetermined)</li> <li>&gt; Paroxysmal exercise-induced dyskinesia (<i>GLUT1</i> gene mutations)</li> <li>&gt; Paroxysmal non-kinesigenic dyskinesias (<i>MR1</i> gene mutations)</li> </ul> <p>Acquired</p> <ul style="list-style-type: none"> <li>&gt; Intracerebral arterial stenosis or Moyamoya (episodic hemichorea)</li> </ul>                                                                                                                                                                                                                                                                                                                                                                                                                                                                                                                                                                                                                                                                                                                                                                                                                                                                                                                                                                                                                                                                                                                                                                              |                                                                                                                                                                                                                                                                                                                                                                                                                                                                                                                                                                                                                                                                                                                                                                                                                                                                                                                                                        |

(Continued)

Table S1. (Continued)

| Clinical presentation                  | Possible aetiologies                                                                                                                                                                                                                                                                                                                                                                                                                                                                                                                                                                                                                                                                                                                                                                                                                                                                                                                                                                                                                                                                                                                                                                                                                                                                                                                                                                                                                                                                                                                                                                                                                                                                       | Diagnostic investigations                                                                                                                                                                                                                                                                                                                                                                                                                                                                                                                                                                                                                                                                                                                                                                                                                                                                                                                                                                                                                                                                                                                                                                                                                                              |
|----------------------------------------|--------------------------------------------------------------------------------------------------------------------------------------------------------------------------------------------------------------------------------------------------------------------------------------------------------------------------------------------------------------------------------------------------------------------------------------------------------------------------------------------------------------------------------------------------------------------------------------------------------------------------------------------------------------------------------------------------------------------------------------------------------------------------------------------------------------------------------------------------------------------------------------------------------------------------------------------------------------------------------------------------------------------------------------------------------------------------------------------------------------------------------------------------------------------------------------------------------------------------------------------------------------------------------------------------------------------------------------------------------------------------------------------------------------------------------------------------------------------------------------------------------------------------------------------------------------------------------------------------------------------------------------------------------------------------------------------|------------------------------------------------------------------------------------------------------------------------------------------------------------------------------------------------------------------------------------------------------------------------------------------------------------------------------------------------------------------------------------------------------------------------------------------------------------------------------------------------------------------------------------------------------------------------------------------------------------------------------------------------------------------------------------------------------------------------------------------------------------------------------------------------------------------------------------------------------------------------------------------------------------------------------------------------------------------------------------------------------------------------------------------------------------------------------------------------------------------------------------------------------------------------------------------------------------------------------------------------------------------------|
| <b>Chronic, progressive chorea</b>     | <p>Early onset</p> <ul style="list-style-type: none"> <li>&gt; Friedreich ataxia</li> <li>&gt; Ataxia-teleangiectasia</li> <li>&gt; Ataxia with oculomotor apraxia types 1 and 2</li> <li>&gt; Pantothenate kinase-associated neurodegeneration</li> <li>&gt; Wilson's disease</li> <li>&gt; Aceruloplasminemia</li> <li>&gt; Lesch-Nyhan syndrome</li> <li>&gt; Leigh syndrome</li> <li>&gt; Infantile bilateral striatal necrosis syndrome</li> <li>&gt; Non-ketotic hyperglycinemia</li> <li>&gt; Recessive hereditary methemoglobinemia type 2</li> <li>&gt; Beta-ketothiolase deficiency</li> </ul> <p>Adult-onset</p> <ul style="list-style-type: none"> <li>&gt; Huntington's disease</li> <li>&gt; <i>C9orf72</i> gene expansion-related neurodegeneration</li> <li>&gt; Huntington's disease-like 2</li> <li>&gt; Neuroacanthocytosis syndromes (chorea-acanthocytosis, McLeod syndrome)</li> <li>&gt; Spinocerebellar ataxia 17 (much less commonly other types, eg 1, 2, 3, 7, 8, 14, dentato-rubro-pallidolusian atrophy, POLG-1 mutations)</li> <li>&gt; Pallido-nigro-lusian atrophy</li> <li>&gt; Neuroferritinopathy</li> <li>&gt; Basal ganglia calcifications</li> <li>&gt; Hepatocerebral degeneration</li> <li>&gt; Huntington's disease-like 1 and Creutzfeldt-Jakob disease</li> <li>&gt; <i>RNF216</i>-associated neurodegeneration (variant of Gordon Holmes syndrome)</li> </ul> <p>Mixed age at onset</p> <ul style="list-style-type: none"> <li>&gt; Niemann-Pick disease type C</li> <li>&gt; Non-ketotic hyperglycinemia</li> <li>&gt; Hereditary methemoglobinaemia type 2</li> <li>&gt; Beta-ketothiolase deficiency</li> <li>&gt; Neurosyphilis</li> </ul> | <p><i>First level</i></p> <ul style="list-style-type: none"> <li>&gt; Magnetic resonance imaging head</li> <li>&gt; Thyroid function tests</li> <li>&gt; Copper/coeruloplasmin studies</li> <li>&gt; Uric acid</li> <li>&gt; Liver function tests, calcium and phosphate</li> <li>&gt; Anti-<math>\beta</math>2-glycoprotein I (IgG) antibodies</li> <li>&gt; Anti-double stranded DNA antibodies</li> <li>&gt; Lupus anticoagulant</li> <li>&gt; Albumin</li> <li>&gt; Cholesterol</li> <li>&gt; Plasma and CSF lactate/pyruvate</li> <li>&gt; Urinary and serum organic and amino acids</li> <li>&gt; Creatine phosphokinase</li> <li>&gt; Ferritin</li> </ul> <p><i>Second level</i></p> <ul style="list-style-type: none"> <li>&gt; alpha 1-fetoprotein serum</li> <li>&gt; Cerebral SPECT</li> <li>&gt; Somatosensory evoked potentials</li> <li>&gt; Genetic screening for <i>TITF1/NKX2.1</i>, <i>FRDA</i>, <i>APTX</i>, <i>SETX</i> gene mutations</li> <li>&gt; Genetic screening for <i>IT15</i>, <i>JPH3</i>, <i>SCAs</i>, <i>DRPLA</i>, <i>PRNP</i> and others</li> <li>&gt; Peripheral blood film for acanthocyte search</li> <li>&gt; Erythrocyte Kx and Kell antigen screening</li> <li>&gt; Skin biopsy for filipin staining on fibroblasts</li> </ul> |
| <b>Chronic, non-progressive chorea</b> | <p>Benign hereditary chorea (<i>TITF1/NKX2.1</i> gene mutations)</p> <p>Dyskinetic cerebral palsy spectrum</p> <p>Tardive dyskinesia</p> <p>L-dopa-induced dyskinesia (may worsen over time)</p>                                                                                                                                                                                                                                                                                                                                                                                                                                                                                                                                                                                                                                                                                                                                                                                                                                                                                                                                                                                                                                                                                                                                                                                                                                                                                                                                                                                                                                                                                           |                                                                                                                                                                                                                                                                                                                                                                                                                                                                                                                                                                                                                                                                                                                                                                                                                                                                                                                                                                                                                                                                                                                                                                                                                                                                        |

CSF = cerebrospinal fluid; DRPLA = Dentatorubral-pallidolusian atrophy; ECG = Electrocardiogram; PCR = polymerase chain reaction; SCA = spinocerebellar ataxia; SPECT = single-photon emission computed tomography;  
Martino D, Espay AJ, Fasano A, Morgante F. *Disorders of movement: a guide to diagnosis and treatment*. Heidelberg: Springer-Verlag, 2016.
